# Supplementary material for: Valorisation of the Invasive Macroalgae Undaria pinnatifida (Harvey) Suringar for the Green Synthesis of Gold and Silver Nanoparticles with Antimicrobial and Antioxidant Potential
Source: MDPI journal article supplement (doi:10.3390/md21070397), 2023-07-09
Supplement: s1 [file s1]

## Supplementary Materials

For the verification of hyphae production by *C. albicans* 124a, *C. albicans* SC5314, *Candida auris* 17-270 and *Candida auris* 17-274, with and without the incubation of the extracts and nanoparticles (0.54  $\mu\text{g/mL}$  was identified as the MFC of Ag@UP and Au@UP against *C. albicans* 124a and both *C. auris* strains; for reference strain *C. albicans* SC5314, MFC were 1.97  $\mu\text{g/mL}$  for Ag@UP and >11.81  $\mu\text{g/mL}$  for Au@UP), the *Candida* were grown in Dulbecco's Modified Eagle Medium (DMEM) supplemented with 10% fetal bovine serum (FBS). They were then incubated with the compounds and after 24h the cells were fixed in a 70% (v/v) ethanol solution and visualized at 40X objective (**Figure S1** and **Figure S2**). All results are expressed in percentage, in relation to the hyphae growth observed in life control samples.

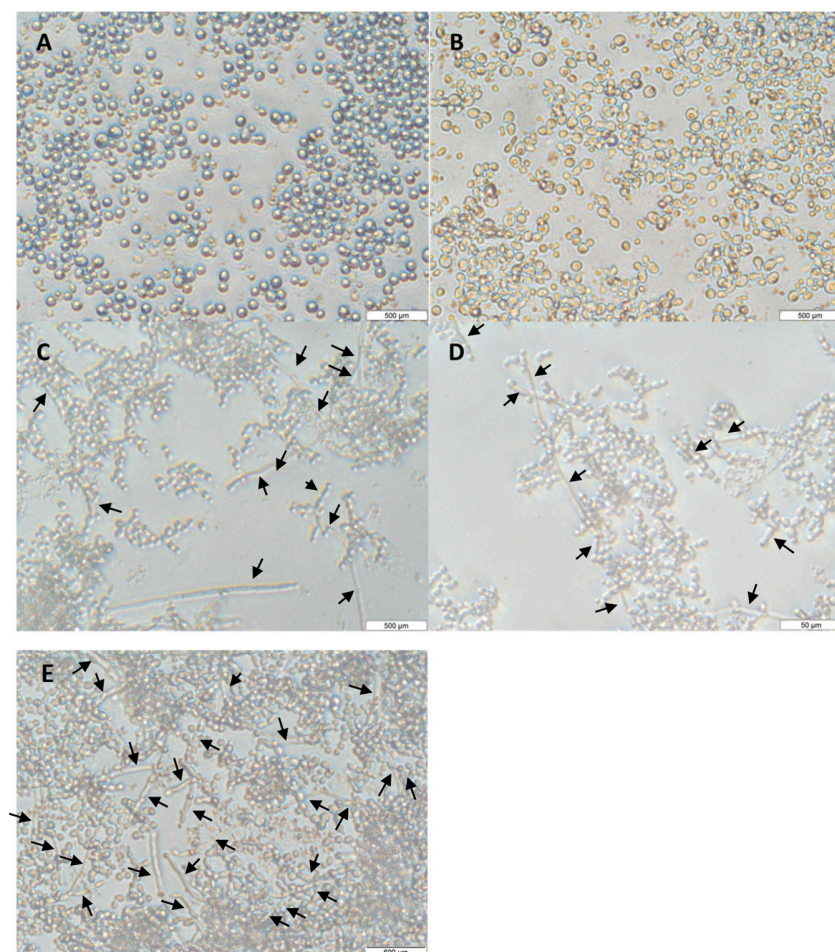

**Figure S1:** Representative images of *Candida* sp in the presence (A, B) and absence (C, D, control E) of the nanoparticles. Forming hyphae are identified by an arrow head. Size bars correspond to 500  $\mu\text{m}$ .

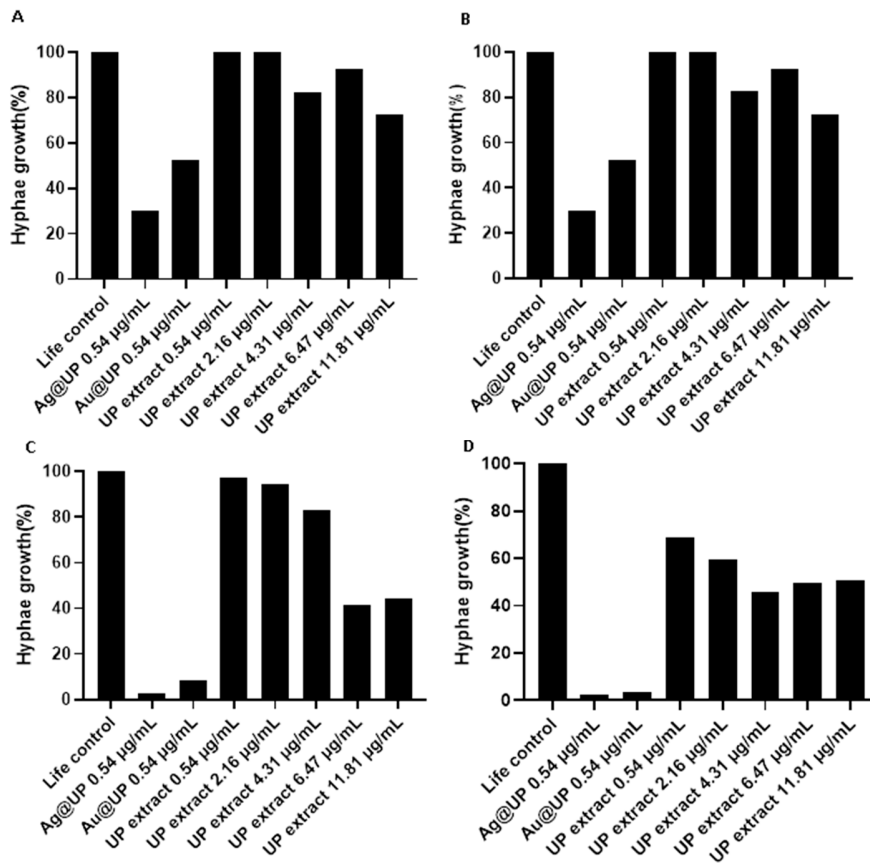

**Figure S2:** Hyphae growth assay in different *Candida* species (*C. albicans* 124a (A), *C. albicans* SC5314 (B), *C. auris* 17-274 (C), *C. auris* 17-270 (D)) expressed against the growth control after 24 h of incubation with Ag@UP, Au@UP and UP extract. Results are shown as a percentage of growth in relation to the life control (only medium).

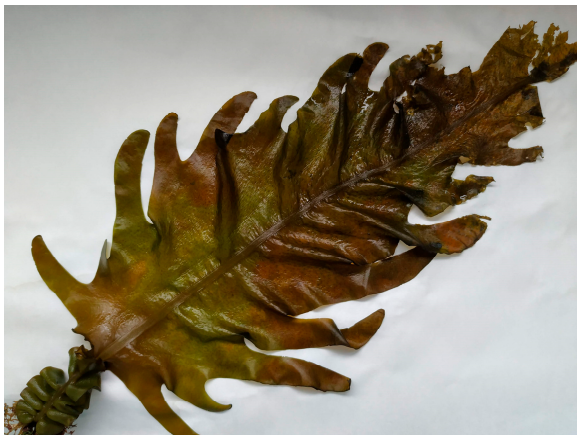

**Figure S3-** Imagen of *Undaria pinnatifida* (Harvey) Suringar 1873 (published in [20]).
